# Supplementary material
Source: PubMed Central journal article supplement (PMC6481955)
Supplement: NIHMS1517151-supplement-2.pdf [file NIHMS1517151-supplement-2.pdf]

## Supplementary Figures

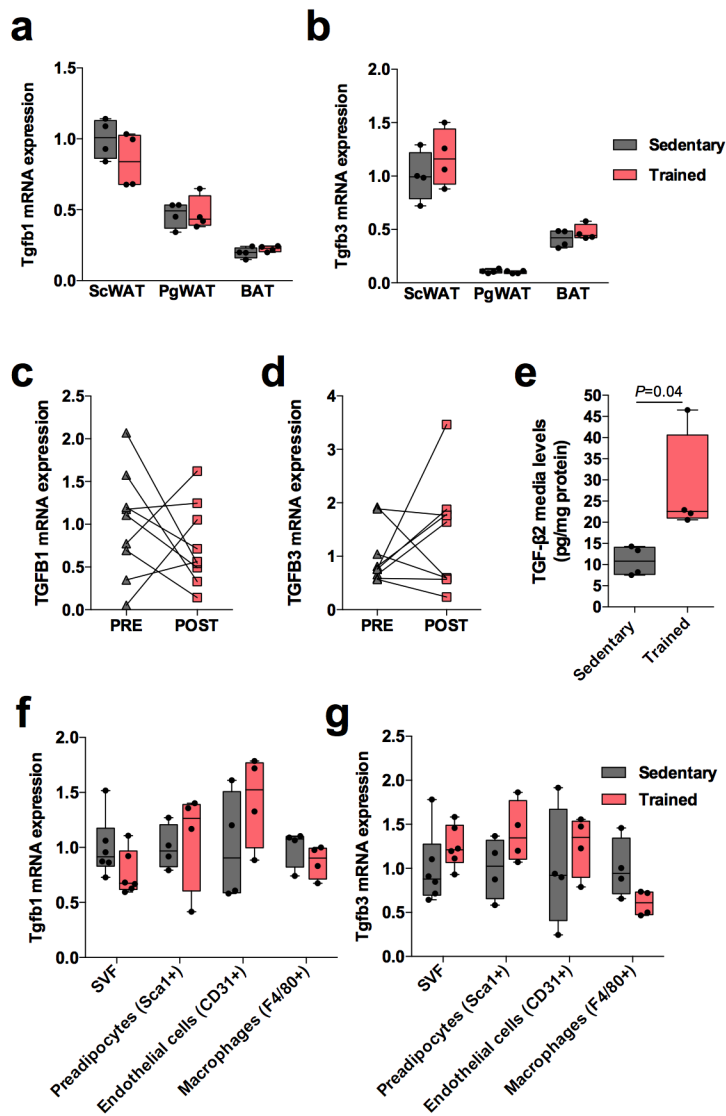

**Supplementary Figure 1.** Exercise training does not affect Tgfb1 and Tgfb3 expression in adipose tissue. **(a)** Tgfb1 and **(b)** Tgfb3 mRNA relative expression in scWAT, pgWAT, and BAT in trained mice;  $n=4$  mice. **(c)** TGFB1 and **(d)** TGFB3 mRNA relative expression in human scWAT pre-and post-aerobic exercise training.  $n=9$  mice. **(e)** Mature adipocytes isolated from trained pgWAT were incubated in serum-free media and TGF- $\beta$ 2 concentrations were determined in the media.  $n=4$ . **(f)** Tgfb1 and **(g)** Tgfb3 mRNA relative expression in stromal vascular fraction, preadipocytes, endothelial cells, and macrophages isolated from scWAT of trained mice;  $n=4$  mice. Data are presented as box plots (min, max, median, and 25th and 75th percentiles) with dots as individual values (**a**, **b**, **e**, **f** and **g**), or individual values (**c** and **d**). Unpaired two-tailed Student's t-tests were used for **a**, **b**, **e**, **f** and **g**. Paired two-tailed Student's t-tests were used for **c** and **d**.

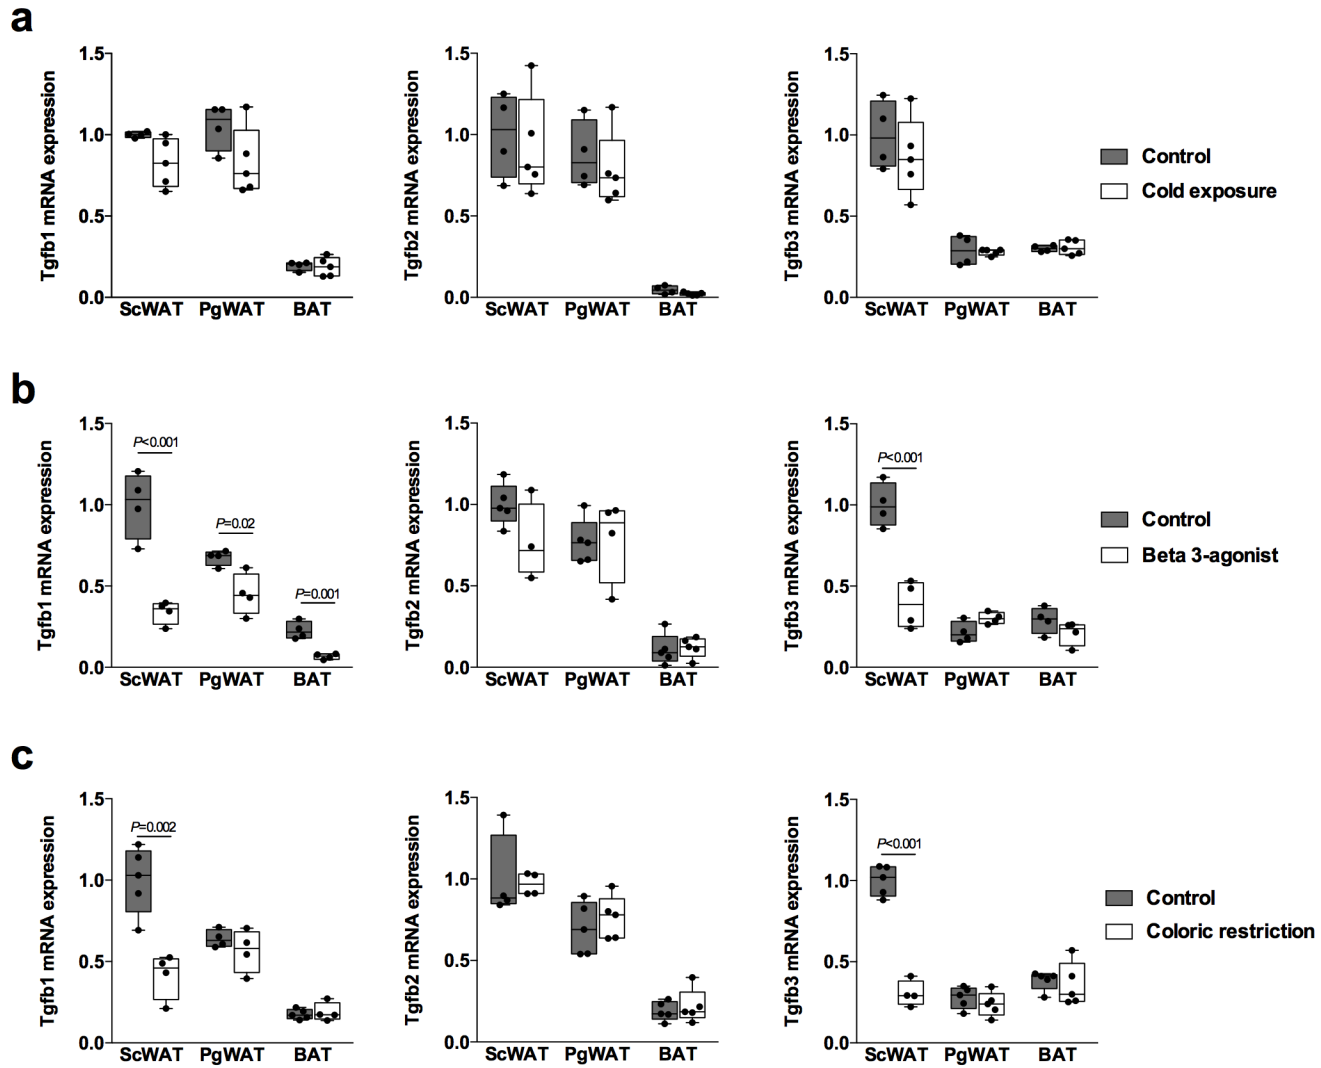

**Supplementary Figure 2.** Effects of cold exposure, calorie restriction, and thermogenic beta 3-agonist on Tgfb1, Tgfb2, and Tgfb3 relative expression in adipose tissue. **(a,b,c)** Tgfb1, Tgfb2 and Tgfb3 mRNA relative expression in scWAT, pgWAT, and BAT in response to **(a)** 5 days of cold exposure, **(b)** 5 days of beta 3-agonist (CL-316,243) treatment, and **(c)** 14 days of calorie restriction;  $n=4$  or 5 mice. Data are presented as box plots (min, max, median, and 25th and 75th percentiles) with dots as individual values. Unpaired two-tailed Student's t-tests were used.

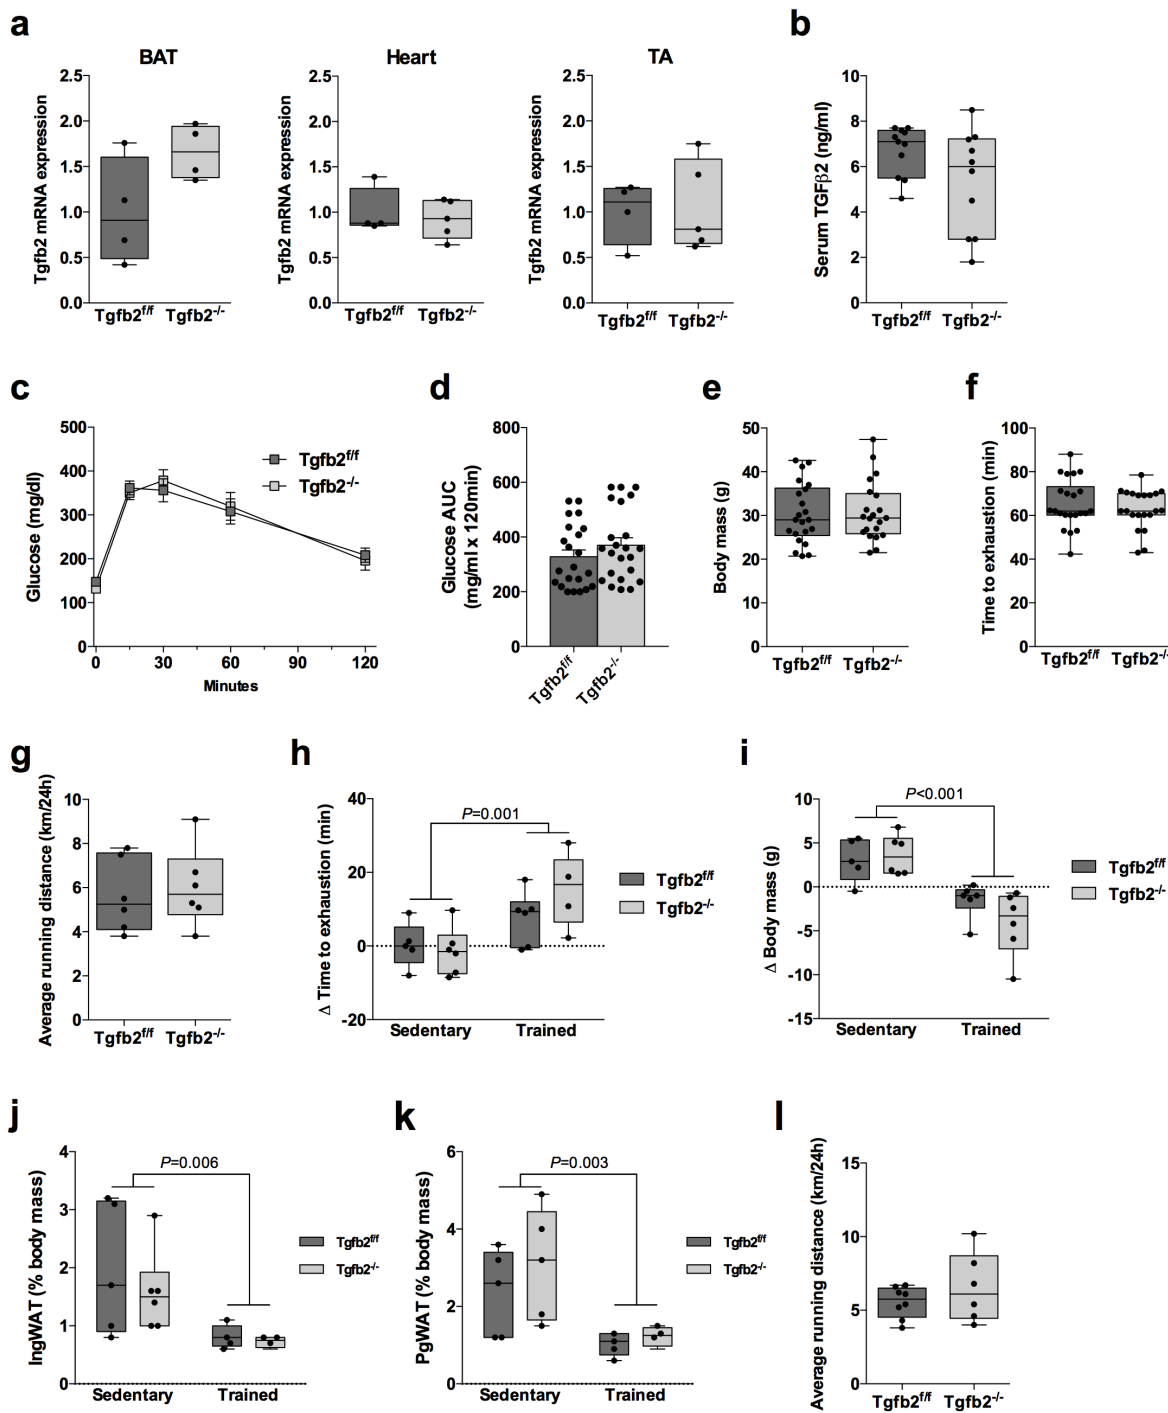

**Supplementary Figure 3.** Adipose-specific *Tgfb2* knockout mice (*Tgfb2*<sup>-/-</sup>) and control (*Tgfb2*<sup>fl/fl</sup>) mice present similar TGF-β2 serum levels, glucose metabolism, and exercise capacity. **(a)** *Tgfb2* mRNA relative expression in BAT, heart, and *tibialis anterior* (TA); *n*=4 mice. **(b)** TGF-β2 serum concentration; *n*=11 *Tgfb2*<sup>fl/fl</sup> mice, 10 *Tgfb2*<sup>-/-</sup> mice. **(c)** Glucose tolerance test (GTT) and **(d)** area under the curve (GTT AUC); *n*=22 *Tgfb2*<sup>fl/fl</sup>, *n*=23 *Tgfb2*<sup>-/-</sup> mice. **(e)** Body mass; *n*=22 *Tgfb2*<sup>fl/fl</sup>, *n*=21 *Tgfb2*<sup>-/-</sup> mice. **(f)** Exercise capacity; *n*=22 *Tgfb2*<sup>fl/fl</sup> mice, *n*=21 *Tgfb2*<sup>-/-</sup> mice. **(g,h,i)** *Tgfb2*<sup>-/-</sup> and *Tgfb2*<sup>fl/fl</sup> mice had access to running wheel for 28 days. **(g)** Average running distance and delta changes in **(h)** exercise capacity and **(i)** body mass were analyzed. *n*=5 or 6 mice. **(j,k)** percentage of **(j)** scWAT and **(k)** pgWAT mass in trained *Tgfb2*<sup>-/-</sup> mice. *n*=4 or 5 mice. **(l)** Average running distance in *Tgfb2*<sup>-/-</sup> and *Tgfb2*<sup>fl/fl</sup> trained mice. scWAT was collected for transplantation experiments in **Figure 1q,r**; *n*=8 *Tgfb2*<sup>fl/fl</sup> mice, *n*=5 *Tgfb2*<sup>-/-</sup> mice. Data are presented as box plots (min, max, median, and 25th and 75th percentiles) with dots as individual values (**a, b, d, e, f, g, h, i, j, k** and **l**) or mean ± s.e.m (**c**). Unpaired two-tailed Student's *t*-tests were used for **a, b, d, e, f, g** and **l**. ANOVA was used for **c, h, i, j**, and **k**.

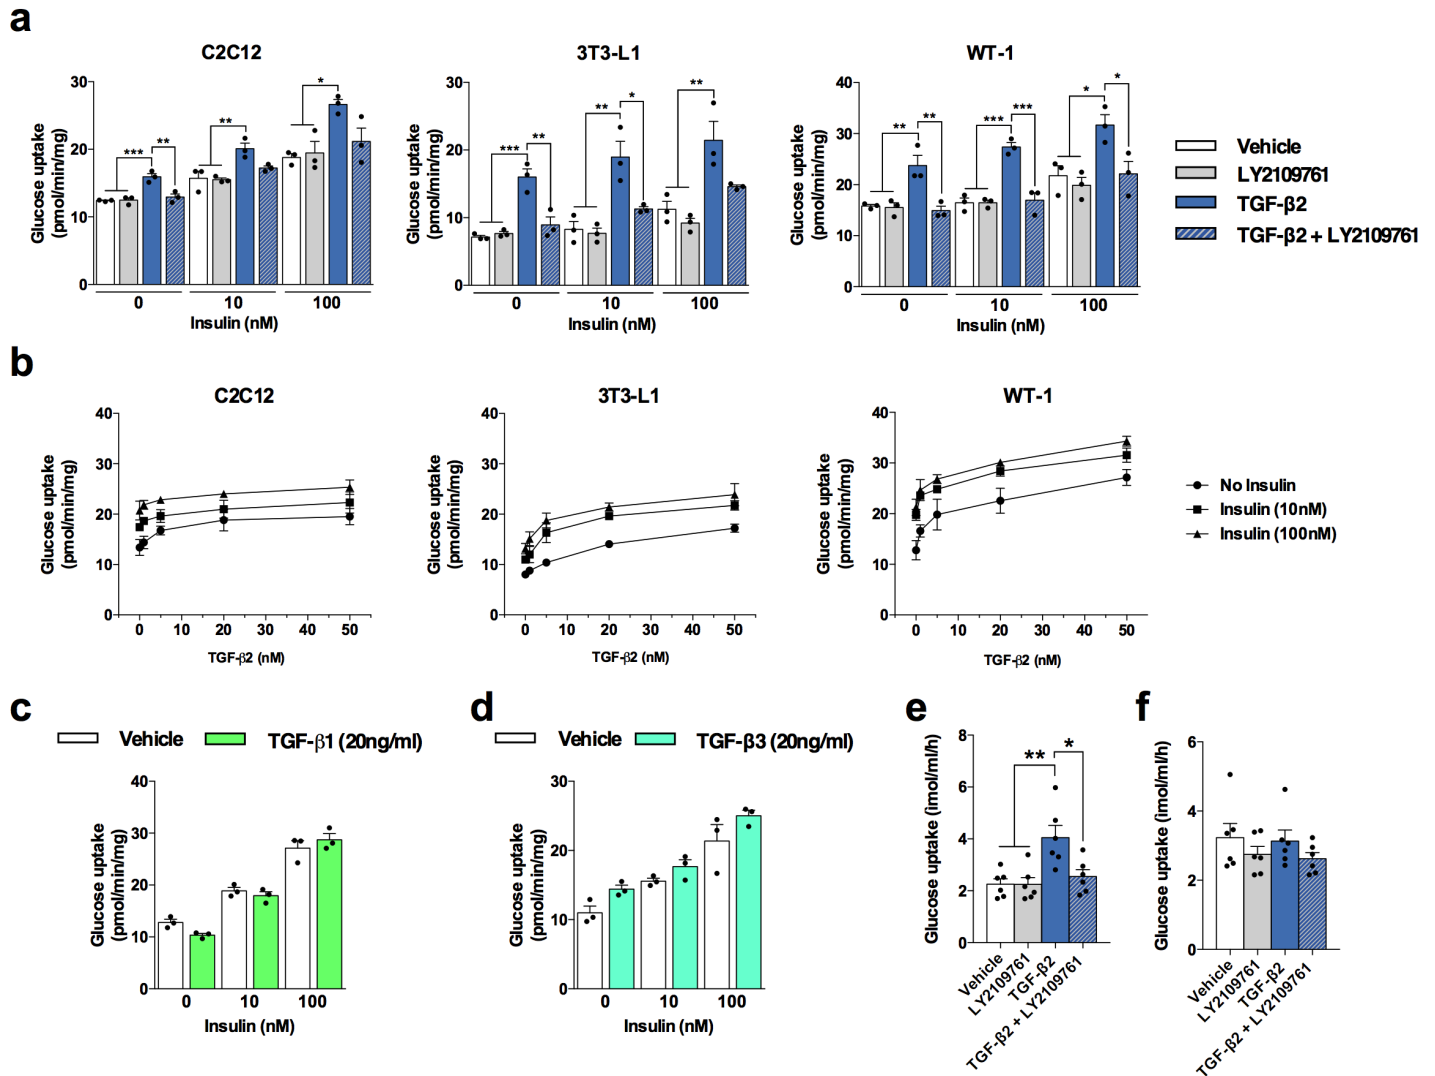

**Supplementary Figure 4.** Effects of recombinant TGF- $\beta$ 1, TGF- $\beta$ 2 or TGF- $\beta$ 3 incubation on glucose uptake *in vitro*. **(a)** Glucose uptake in C2C12 myotubes, 3T3-L1 adipocytes, and WT-1 brown adipocytes treated with TGF- $\beta$ 2 and/or TGF- $\beta$  receptor inhibitor (LY2109761).  $n=3$  biological replicates. **(b)** Glucose uptake in C2C12 myotubes, 3T3-L1 adipocytes, and WT-1 brown adipocytes treated with different concentrations of TGF- $\beta$ 2;  $n=3$  biological replicates. **(c,d)** Glucose uptake in C2C12 myotubes treated with **(c)** TGF- $\beta$ 1 or **(d)** TGF- $\beta$ 3;  $n=3$  biological replicates. **(e,f)** Glucose uptake in incubated **(e)** *soleus* and **(f)** EDL muscle treated with TGF- $\beta$ 2 and/or TGF- $\beta$  receptor inhibitor (LY2109761);  $n=6$  biological replicates. Data are presented as mean  $\pm$  s.e.m. Unpaired two-tailed Student's *t*-tests were used for **c** and **d**. ANOVA was used for **a**, **b**, **e** and **f**. When ANOVA showed  $P<0.05$ , Tukey's multiple comparisons tests were used with \* $P<0.05$ ; \*\* $P<0.01$ ; \*\*\* $P<0.001$ .

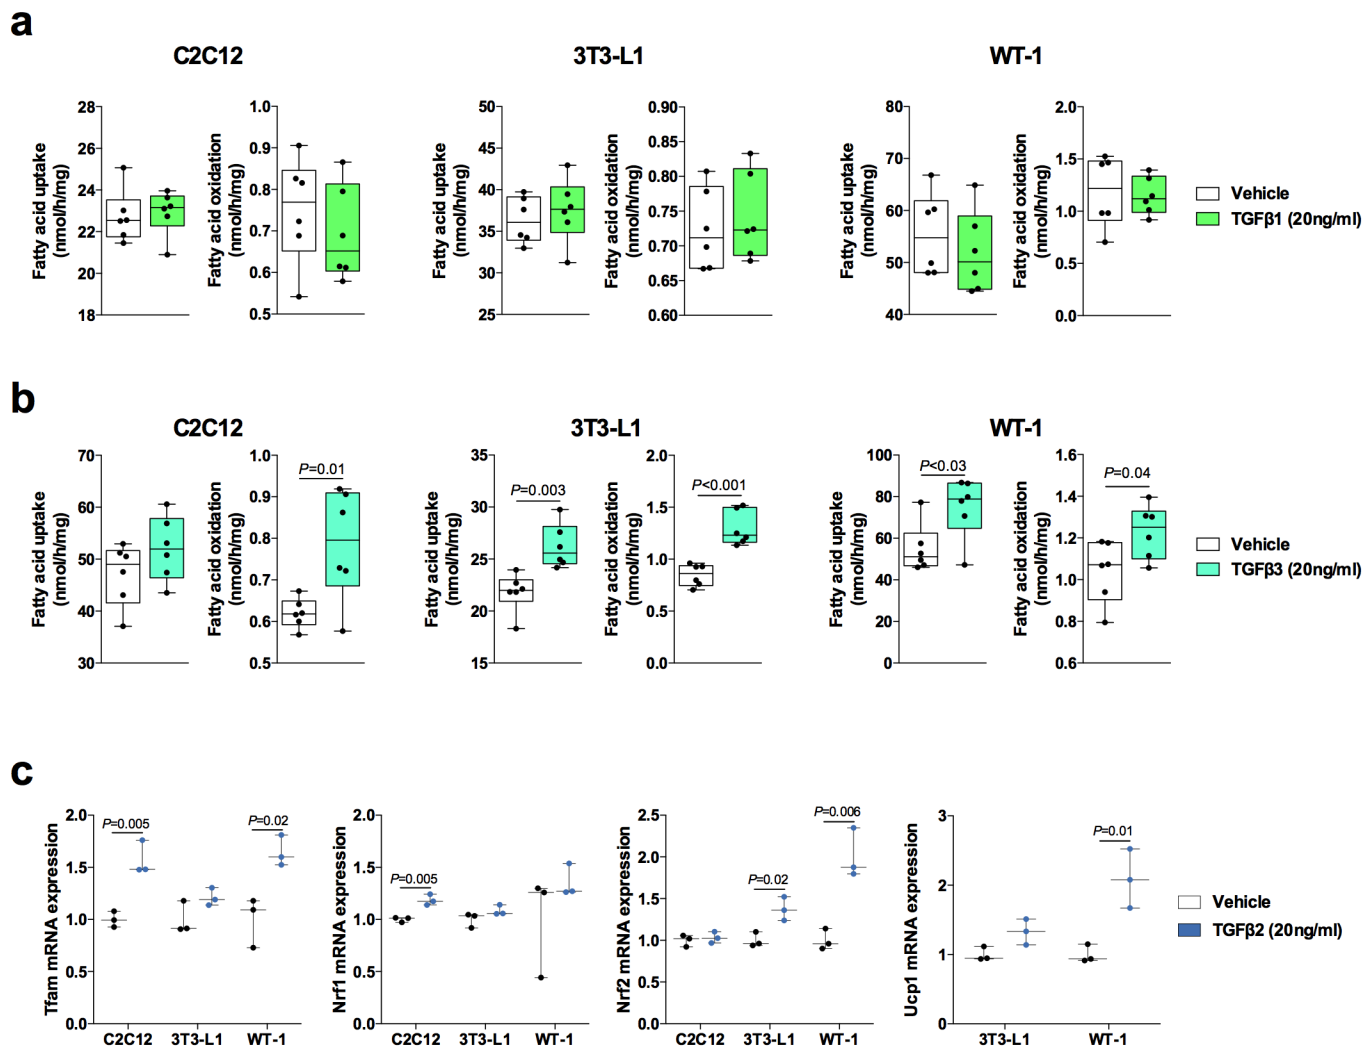

**Supplementary Figure 5.** Effects of recombinant TGF- $\beta$ 1 or TGF- $\beta$ 3 incubation on fatty acid uptake and oxidation *in vitro*. (a,b) [ $^{14}$ C] palmitic acid uptake and oxidation in C2C12 myotubes, 3T3-L1 adipocytes and WT-1 brown adipocytes incubated with TGF- $\beta$ 1 or TGF- $\beta$ 3;  $n=6$  biological replicates. (c) Tfam, Nrf1, Nrf2, and Ucp1 mRNA relative expression in C2C12 myotubes, 3T3-L1 adipocytes, and WT-1 brown adipocytes treated with TGF- $\beta$ 2;  $n=3$  biological replicates. Data are presented as box plots (min, max, median, and 25th and 75th percentiles) with dots as individual values. Unpaired two-tailed Student's t-tests were used.

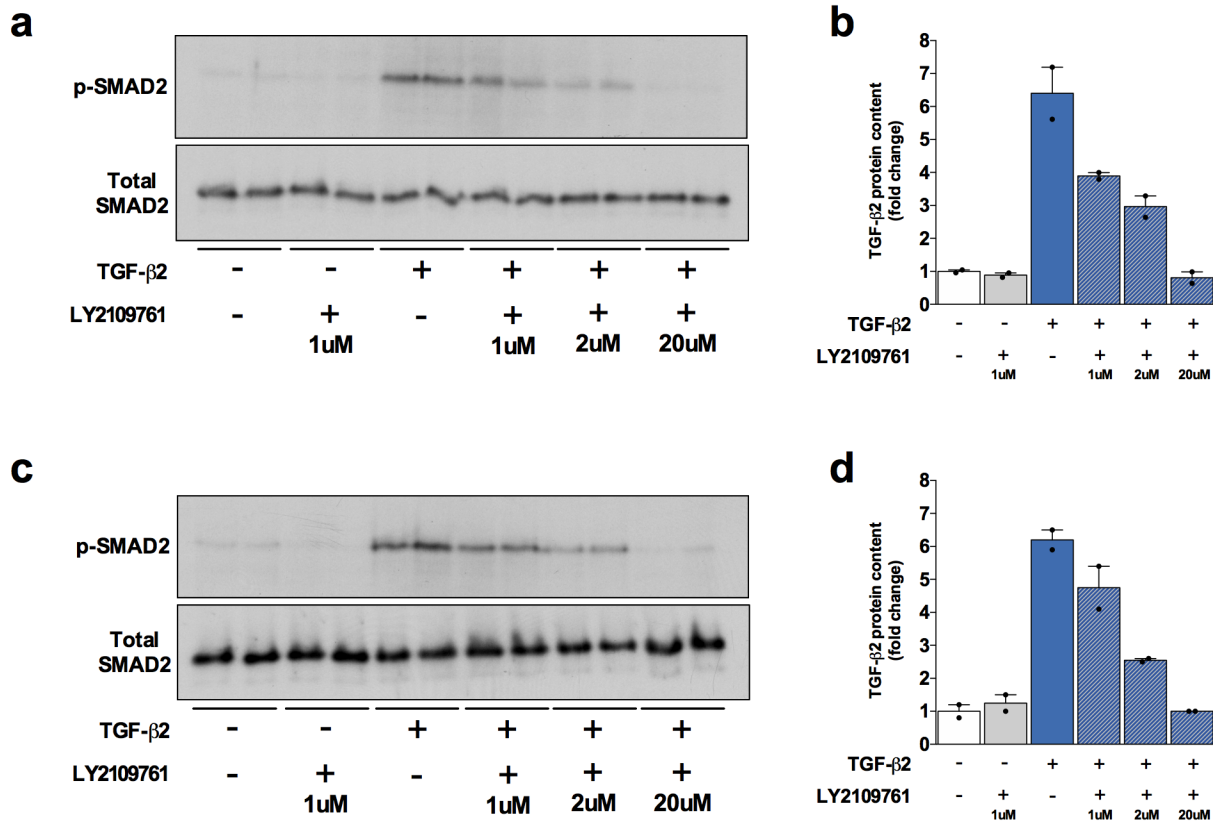

**Supplementary Figure 6.** Effects of recombinant TGF-β2 incubation on SMAD2 phosphorylation. (a) Representative immunoblot and (b) quantification of p-SMAD2/total SMAD2 ratio in C2C12 myotubes treated with TGF-β2 and/or TGF-β receptor inhibitor (LY2109761) for 1 hour.  $n = 2$  biological replicates. (c) Representative immunoblot and (d) quantification of p-SMAD2/total SMAD2 ratio in C2C12 myotubes treated with TGF-β2 and/or TGF-β receptor inhibitor (LY2109761) for 5 hours.  $n = 2$  biological replicates. Data are presented as mean  $\pm$  s.e.m.

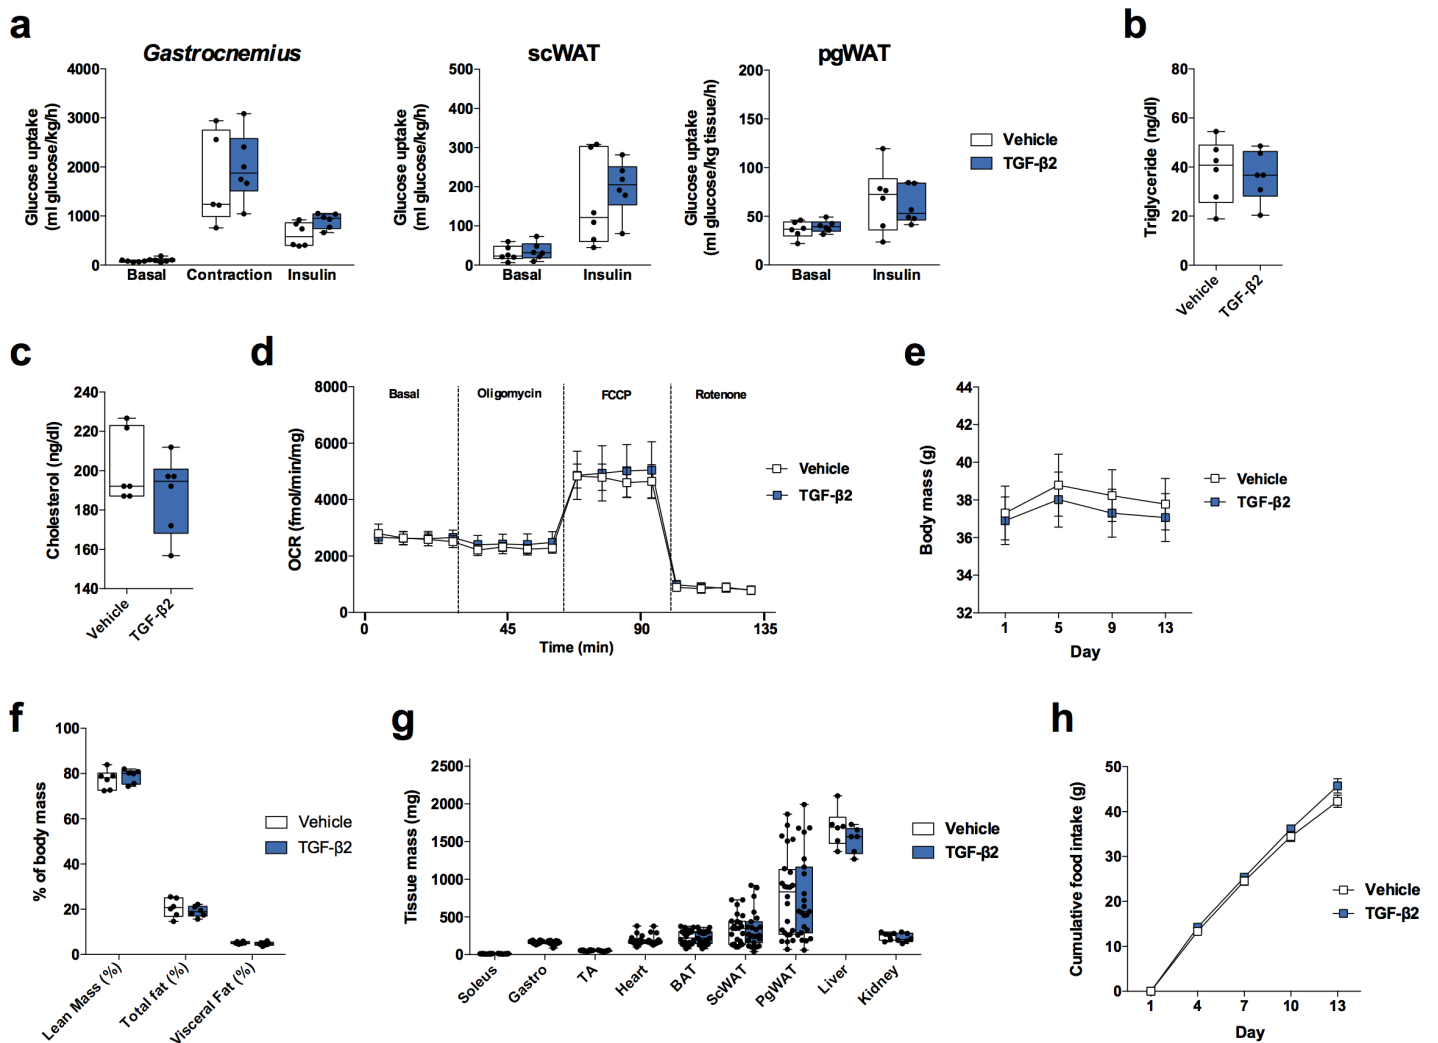

**Supplementary Figure 7.** TGF- $\beta$ 2 infusion via osmotic pump does not affect white adipose tissue glucose uptake and body composition in normal chow diet-fed mice. **(a)** [ $^3$ H]-2-deoxyglucose uptake in *gastrocnemius*, scWAT, and pgWAT after TGF- $\beta$ 2 treatment;  $n = 5$  or 6 mice. **(b)** Serum triglyceride and **(c)** cholesterol concentrations in mice;  $n = 6$  mice. **(d)** Extracellular flux analysis in *flexor digitorum brevis* (FDB);  $n = 5$  mice. **(e)** Body mass;  $n = 25$  mice. **(f)** Percentage of lean, total fat, and visceral fat mass;  $n = 6$  mice. **(g)** Tissue mass.  $n = 6$  mice. **(h)** Food intake;  $n = 7$  mice. Data are presented as box plots (min, max, median, and 25th and 75th percentiles) with dots as individual values (**a**, **b**, **c**, **f** and **g**) or mean  $\pm$  s.e.m (**d**, **e** and **h**). Unpaired two-tailed Student's *t*-tests were used for **a**, **b**, **c**, **f** and **g**. ANOVA was used for **d**, **e** and **h**.

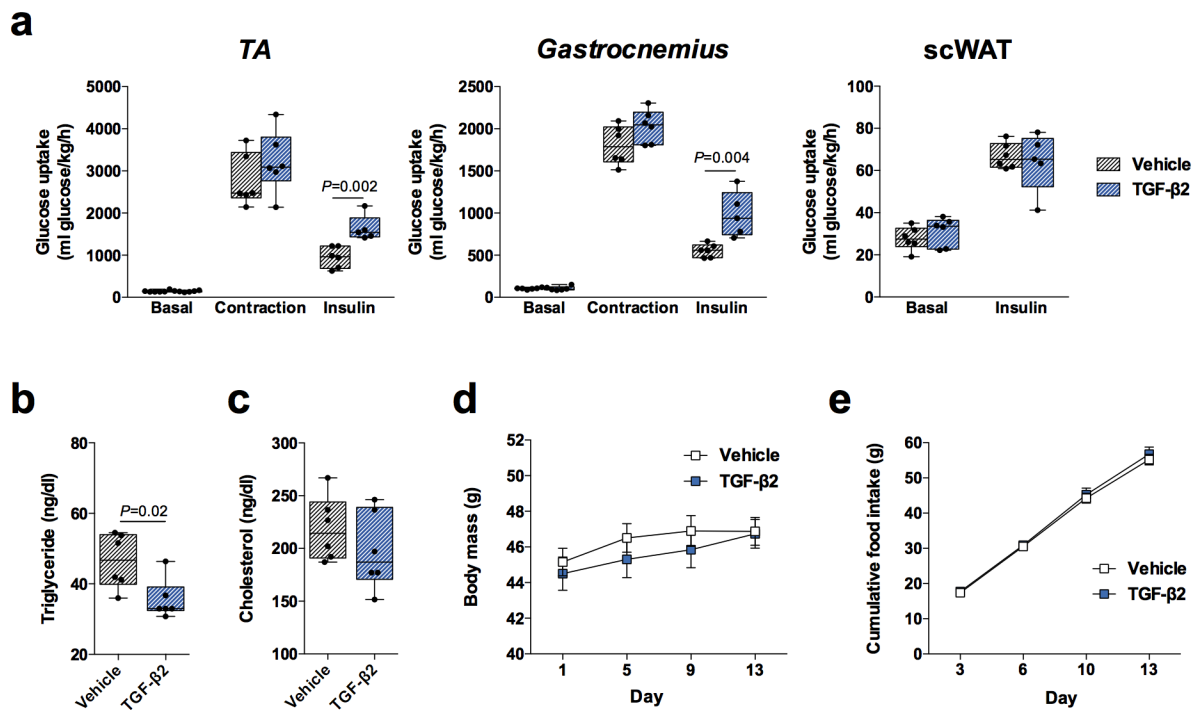

**Supplementary Figure 8.** Effects of TGF- $\beta$ 2 infusion via osmotic pump on skeletal muscle and white adipose tissue glucose uptake, body mass, and food intake in high-fat diet-fed (HFD). TGF- $\beta$ 2 treatment attenuates inflammation in adipose tissue of HFD mice. **(a)** [ $^3$ H]-2-deoxyglucose uptake of *tibialis anterior* (TA), *gastrocnemius*, and scWAT after TGF- $\beta$ 2 treatment in HFD mice;  $n = 5$  or 6 mice. **(b)** Serum triglyceride and **(c)** cholesterol concentrations in HFD mice;  $n = 6$  mice. **(d)** Body mass;  $n = 25$  mice. **(e)** Food intake;  $n = 7$  mice. Data are presented as box plots (min, max, median, and 25th and 75th percentiles) with dots as individual values (**a**, **b** and **c**) or mean  $\pm$  s.e.m (**d** and **e**). Unpaired two-tailed Student's t-tests were used for **a**, **b** and **c**. ANOVA was used for **d** and **e**.



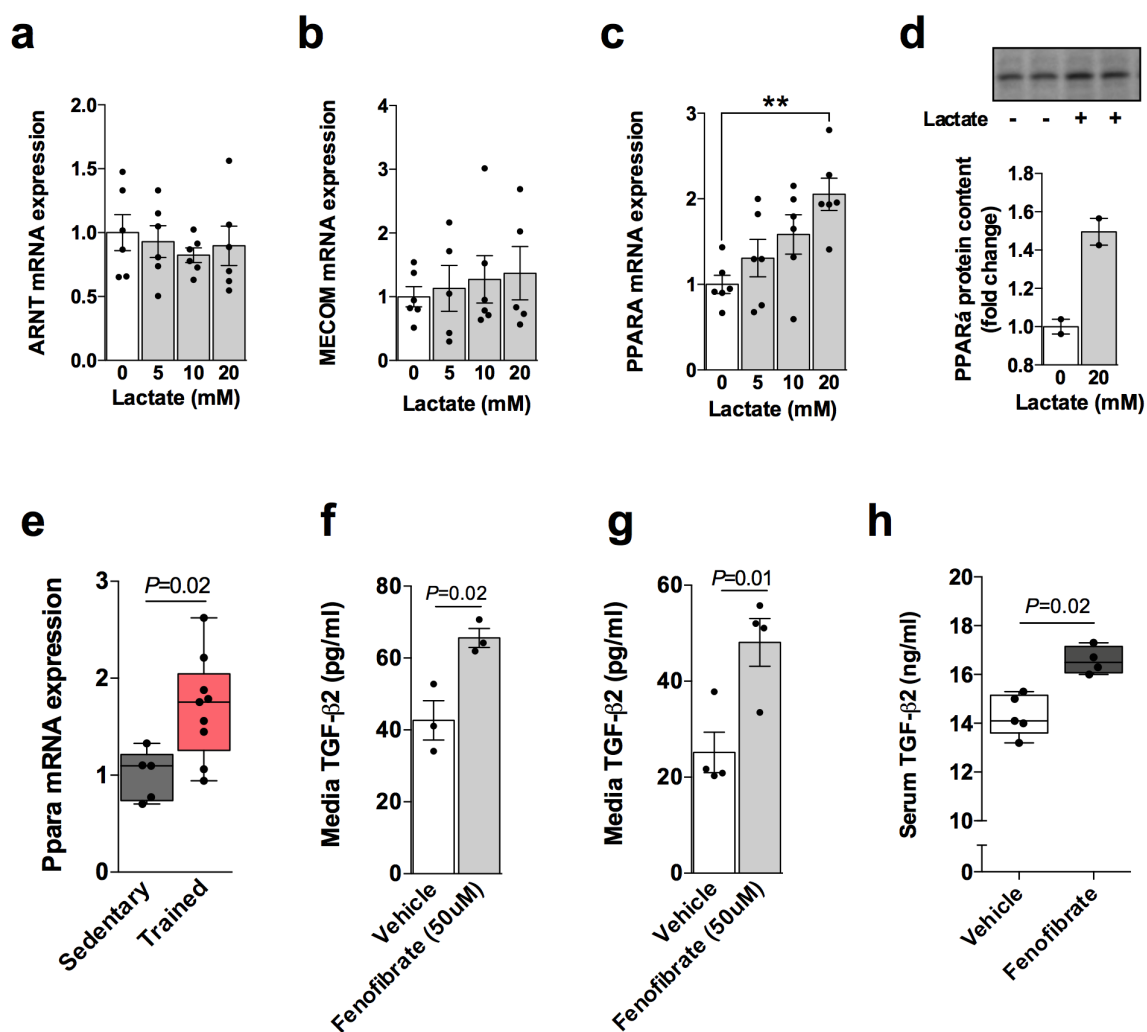

**Supplementary Figure 9.** Lactate and exercise training increase PPAR $\alpha$  expression. **(a)** ARNT, **(b)** MECOM, and **(c)** PPARA mRNA relative expression in human adipocytes treated with different concentrations of lactate;  $n=6$  biological replicates. **(d)** Immunoblot for PPAR $\alpha$  in human adipocytes treated with lactate.  $n=2$  biological replicates **(e)** Ppara mRNA expression in scWAT of trained mice.  $n=5$  sedentary mice,  $n=9$  trained mice. **(f)** TGF- $\beta$ 2 media concentration in 3T3-L1 adipocytes treated with fenofibrate;  $n=3$  technical replicates. **(g)** TGF- $\beta$ 2 media concentration in *ex vivo* scWAT treated with fenofibrate for 24 hours;  $n=4$  biological replicates. **(h)** Serum TGF- $\beta$ 2 concentration in mice injected with fenofibrate intraperitoneally. Data are presented as box plots (min, max, median, and 25th and 75th percentiles) with dots as individual values (**e** and **h**) or mean  $\pm$  s.e.m (**a**, **b**, **c**, **d**, **f** and **g**). Unpaired two-tailed Student's t-tests were used for **e**, **f**, **g** and **h**. ANOVA was used for **a**, **b** and **c**. When ANOVA showed  $P<0.05$ , Tukey's multiple comparisons tests were used with  $**P<0.01$ .

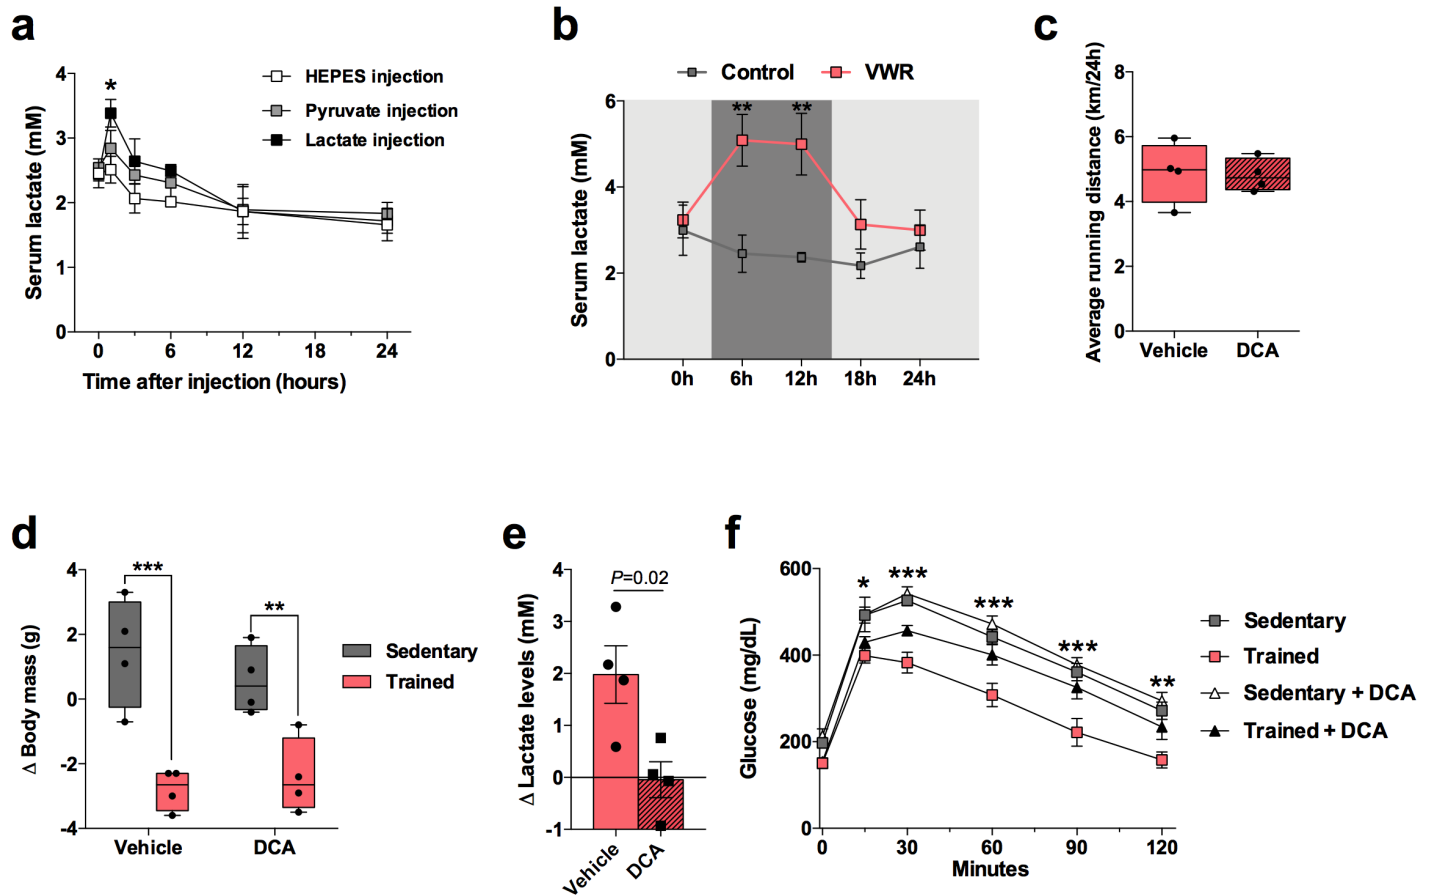

**Supplementary Figure 10.** (a) Time course of lactate serum concentration in mice injected with lactate, pyruvate, or vehicle (HEPES) intraperitoneally;  $n=4$  mice. (b) Time course of serum lactate concentration during voluntary wheel running (VWR);  $n=6$  mice. (c) Average running distance of mice treated daily with dichloroacetate (DCA) injections;  $n=4$  mice. (d) Delta changes in body mass, (e) lactate levels, and (f) glucose tolerance test (GTT) in trained mice after daily dichloroacetate (DCA) injections;  $n=4$  mice. Data are presented as box plots (min, max, median, and 25th and 75th percentiles) with dots as individual values (c and d) or mean  $\pm$  s.e.m (a, b, e and f). Unpaired two-tailed Student's t-tests were used for c and e. ANOVA was used for a, b, d and f. When ANOVA showed  $P<0.05$ , Tukey's multiple comparisons tests were used with \* $P<0.05$ ; \*\* $P<0.01$ , \*\*\* $P<0.001$ .

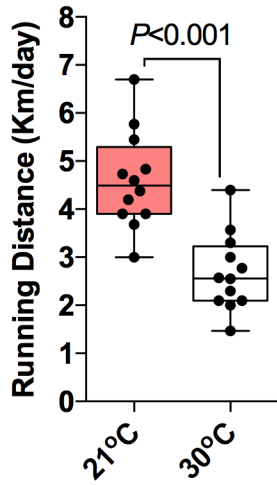

**Supplementary Figure 11.** Running distance in mice housed at 21°C and mice housed in a thermoneutral environment (30°C);  $n = 12$  mice. Data are presented as box plots (min, max, median, and 25th and 75th percentiles) with dots as individual values. Unpaired two-tailed Student's t-test was used.

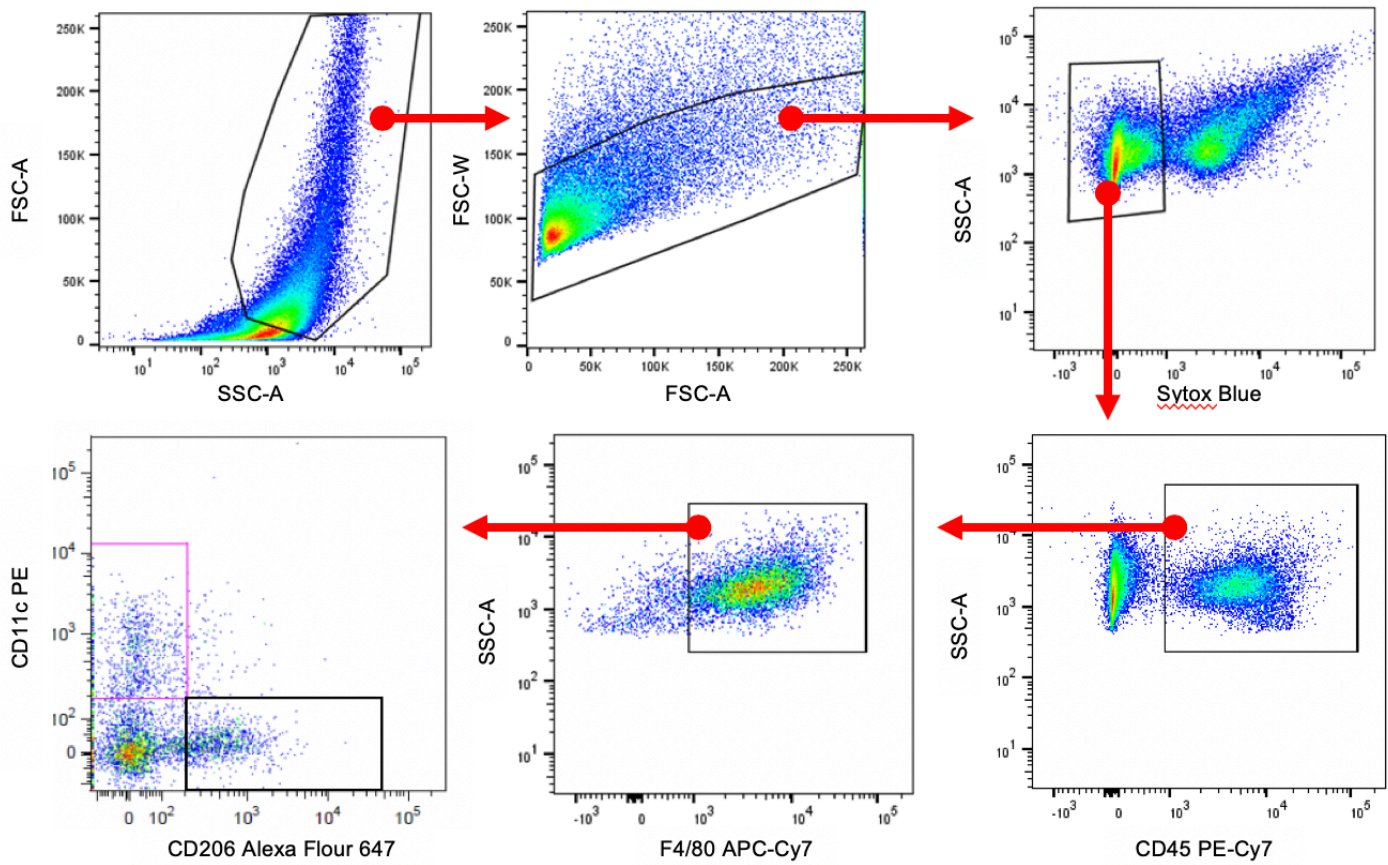

**Supplementary Figure 12.** Gating strategy to identify M1 and M2 macrophages. Cells were incubated with CD45-PE-Cy7, F4/80-APC-Cy7, CD206-Alex647 and CD11c-PE antibodies and suspended in solution with Sytox Blue. M1 or M2 macrophages were identified as F4/80-positive/CD11c-positive/CD206-negative or F4/80-positive/CD11c-negative/CD206-positive cells, respectively.

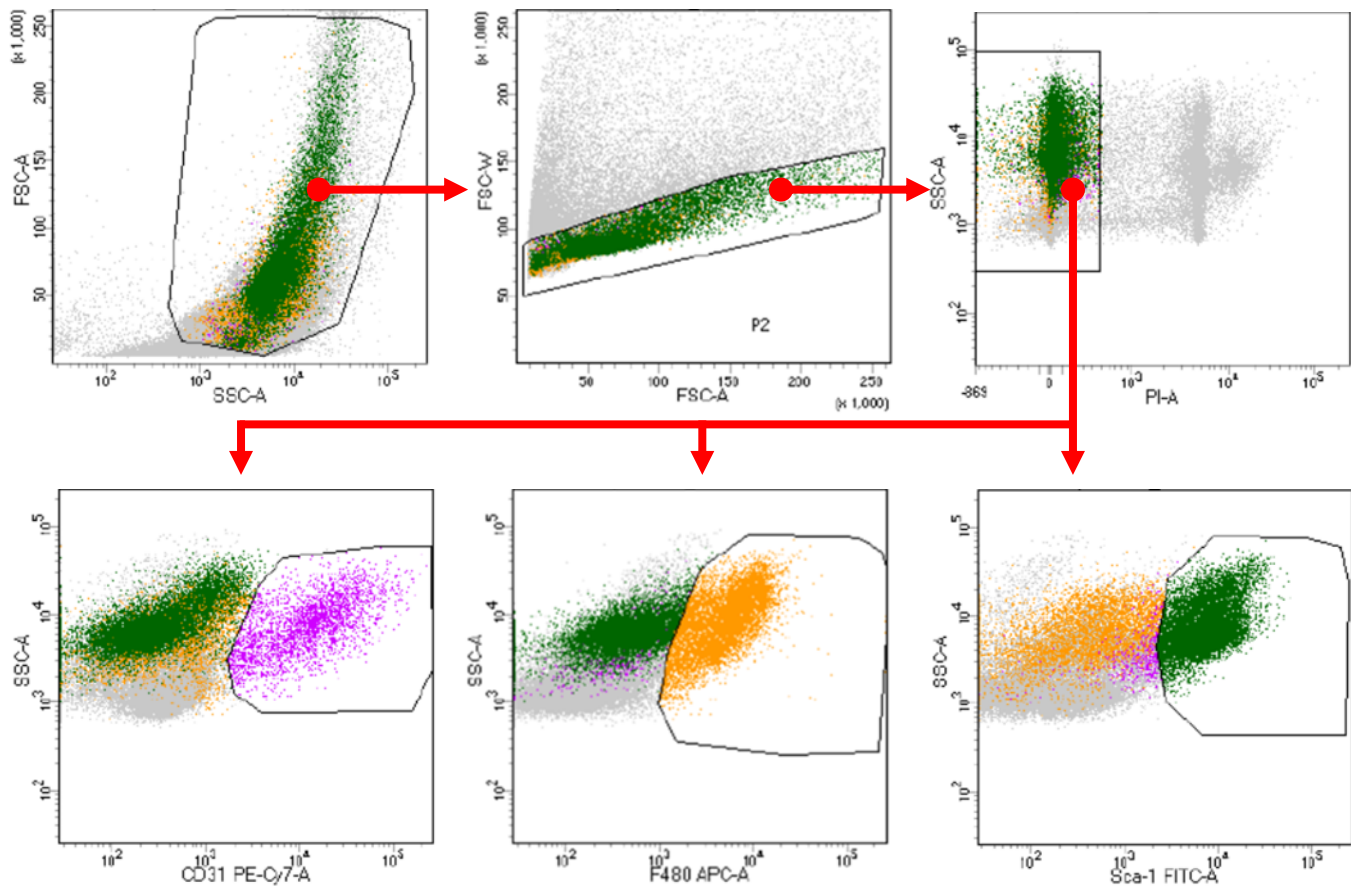

**Supplementary Figure 13.** Gating strategy for sorting preadipocytes, endothelial cells and macrophages. Cells were incubated with CD31-PE-Cy7, F4/80-APC, and Sca-1 FITC antibodies and resuspended in solution with Propidium Iodide Staining Solution (PI).

**Supplementary Figure 14. Uncropped Blots.**

ScWAT TGF- $\beta$ 2 in Figure 1d

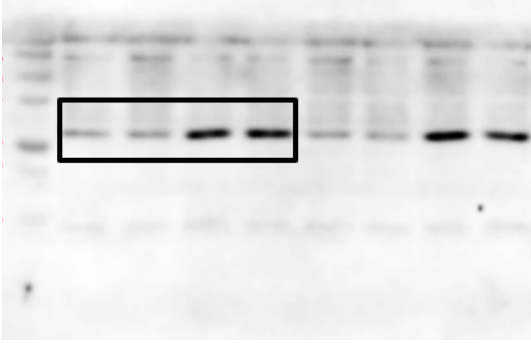

PgWAT TGF- $\beta$ 2 in Figure 1d

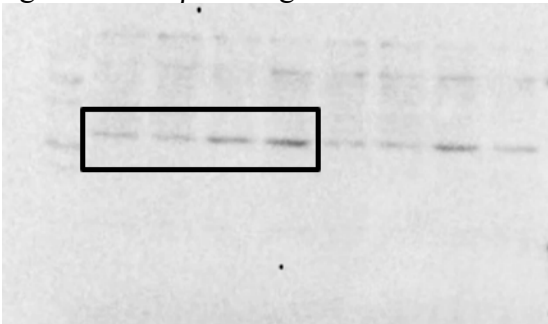

BAT TGF- $\beta$ 2 in Figure 1d

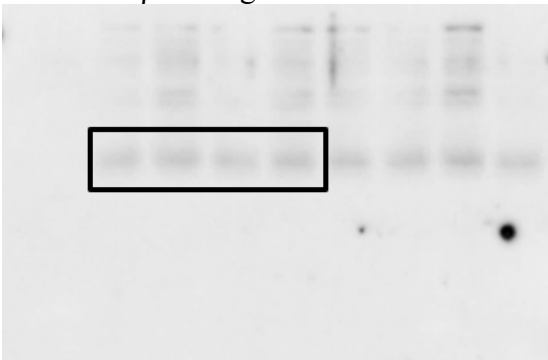

Liver TGF- $\beta$ 2 in Figure 1d

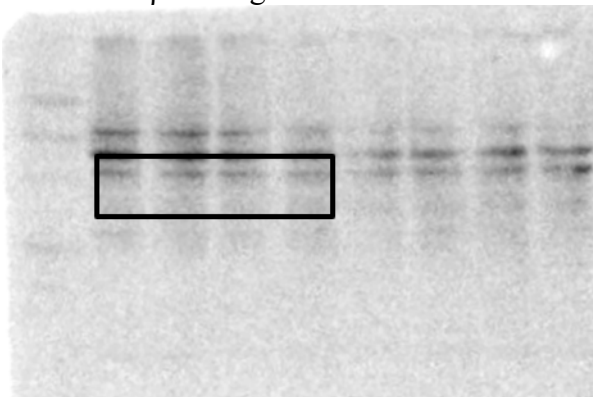

Triceps TGF- $\beta$ 2 in Figure 1d

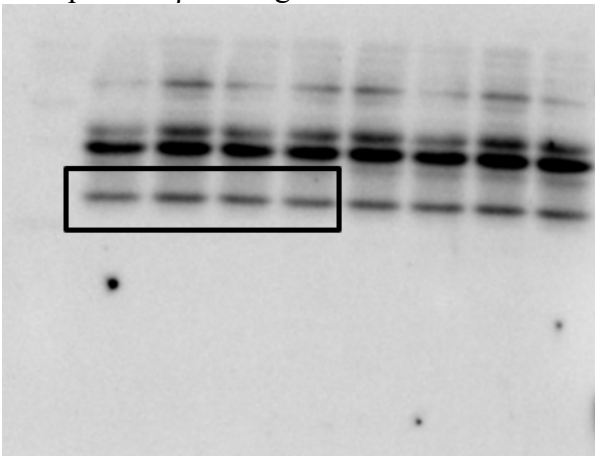

Heart TGF- $\beta$ 2 in Figure 1d

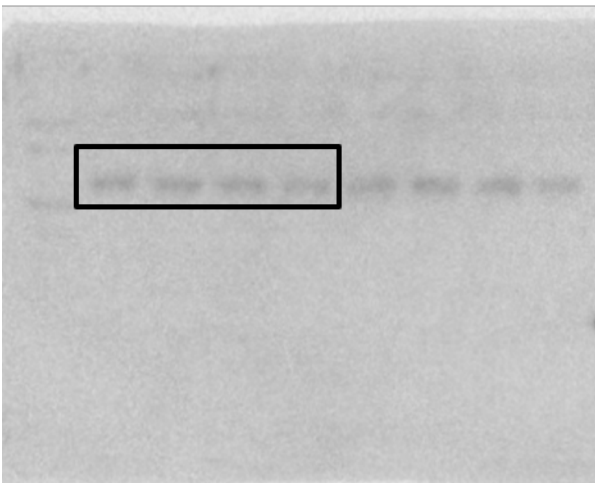

p-SMAD2 in Supplementary Figure 6

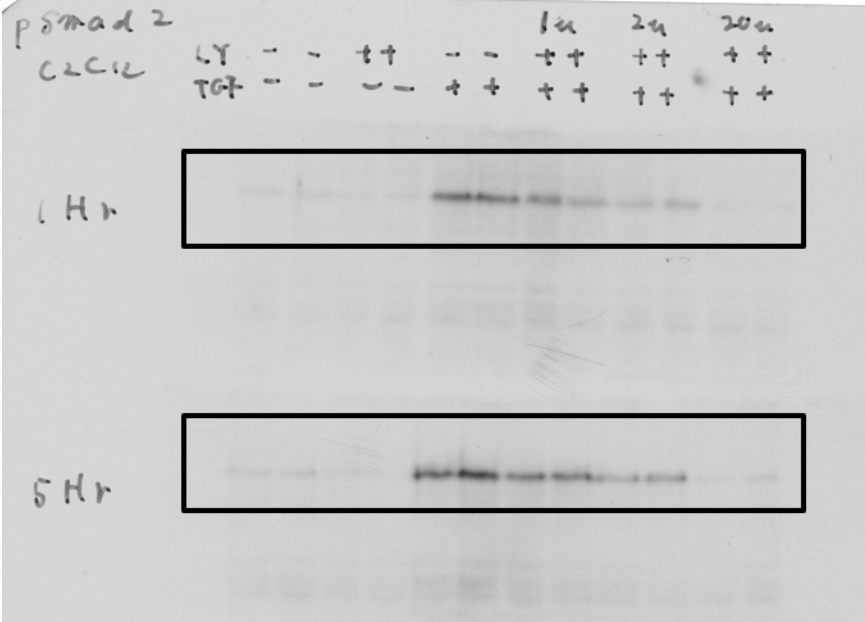

Total SMAD2 in Supplementary Figure 6

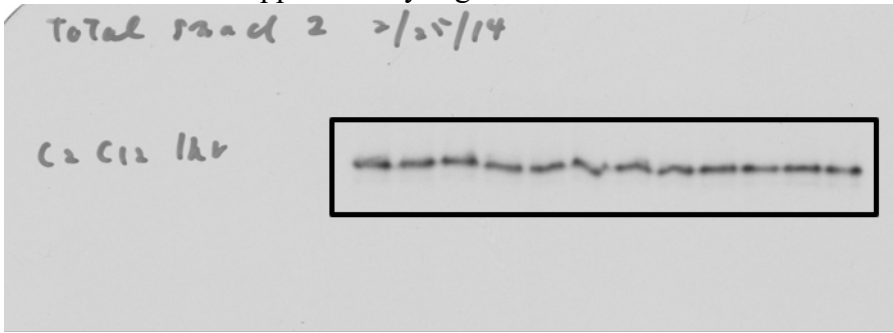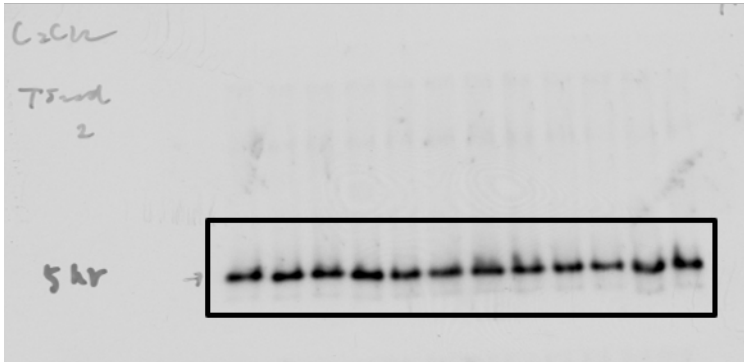

PPAR $\alpha$  in Supplementary Figure 9d

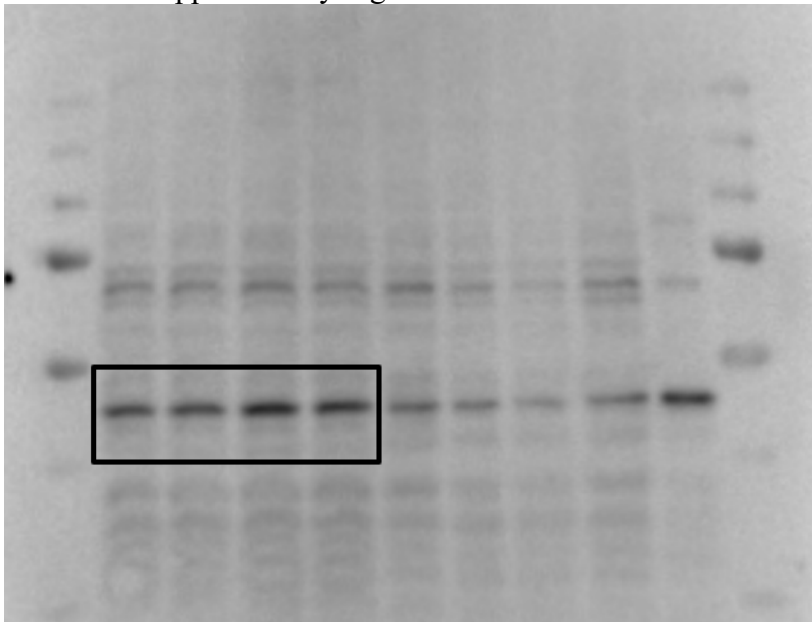



## Supplementary Tables

**Supplementary Table 1.** Separate excel file “Human\_gene\_stats”

**Supplementary Table 2.** List of primer sequences used for RT-qPCR in humans’ samples.

| Gene     | Forward (5' > 3')        | Reverse (5' > 3')       |
|----------|--------------------------|-------------------------|
| ACTB     | CAGCCATGTACGTTGCTATCCAGG | AGGTCCAGACGCAGGATGGCATG |
| ARNT     | GAACCTCACTTCGTGGTGGT     | CAATGTTGTGTCGGGAGATG    |
| ADAMTS12 | ACTTTGGGGCGCTTTGCTAT     | GCAGGCCCTTGATAAAAATGCT  |
| ANGPTL2  | GAACCGAGTGCATAAGCAGGA    | GTGACCCGCGAGTTCATGTT    |
| APLP2    | TGAGCCTCAAATCGCAATGTT    | CCTGTTGGATCAGGTTCCCAT   |
| APOM     | TGCCCCGAAATGGATCTA       | CAGGGCGGCCTTCAGTT       |
| COL11A2  | GCTCCCCCTCTGACTCTCTAC    | CCGGGTGACTCGCTTCTTG     |
| CXCL12   | ACCGCGCTCTGCCTCA         | CATGGCTTTCGAAGAATCGG    |
| CYR61    | ACCGCTCTGAAGGGGATCT      | ACTGATGTTTACAGTTGGGCTG  |
| DAG1     | AGCAAAGGATTGACCTCCTGC    | CCACCGGCACTAATTTTCATGTT |
| DKK2     | CTCACAGATCGGCAGTTCG      | ATGCCAGTCCTTGGTACATGC   |
| FGF5     | CACTGATAGGAACCCTAGAGGC   | CAGATGGAAACCGATGCCC     |
| GAPDH    | GTCTCCTCTGACTTCAACAGCG   | ACCACCCTGTTGCTGTAGCCAA  |
| GAS6     | CCGGGGACTTGTTCCAACC      | CTGCACGAGGTCTTCTCAT     |
| GPX3     | GAGCTTGCACCATTCCGGTCT    | GGGTAGGAAGGATCTCTGAGTTC |
| HAPLN1   | TTGAGAGCATCCGAACTCCT     | GATGATCAGCCCAGCAGATT    |
| HFE2     | GGCTGAGGTGGATAATCTTCCT   | CCCAGGGTTAGCAGTTTGAAT   |
| IGFBP5   | TGACCGCAAAGGATTCTACAAG   | CGTCAACGTACTIONCATGCCT  |
| LOXL1    | CTGTGCTGCGGAGGAGAAG      | GTAGTGGCTGAACTCGTCCA    |
| MASP1    | GTCCATCACTTCCGGTCAGA     | GTGGAGGATGTAGCCGAAGC    |
| MECOM    | TGAAGGAAACCCTGAGGATG     | CGGCTGCTTAAGTTCCTCTG    |
| NTF3     | GAAGTCTGCGACAACAGAGA     | CCCACGTAATCCTCCATGAGA   |
| PPARA    | GTTTGAGGGGGTAACAGCAA     | GCTAACTGCAGAGGGTGAGG    |
| SFRP4    | ACGAGCTGCCTGTCTATGAC     | TGTCTGGTGTGATGTCTATCCAC |
| SOD1     | GGTGGGCCAAAGGATGAAGAG    | CCACAAGCCAAACGACTTCC    |
| TGFB1    | GGCCAGATCCTGTCCAAGC      | GTGGGTTTCCACCATTAGCAC   |
| TGFB2    | AAGAAGCGTGCTTTGGATGCGG   | ATGCTCCAGCACAGAAGTTGGC  |
| TGFB3    | ACTTGACACCCTTGGACTTC     | GGTCATCACCGTTGGCTCA     |
| TIMP3    | CATGTGCAGTACATCCATACGG   | CATCATAGACGCGACCTGTCA   |
| TCN2     | CAGAACAGTGCGAGAGGAGATC   | TCGCCTTGAGACATGCTGTCC   |
| VEGF     | CATGCAGATTATGCGGATCAA    | TTTGTGTGCTGTAGGAAGCTCAT |

**Supplementary Table 3.** List of primer sequences used for RT-qPCR in mice' samples.

| <b>Gene</b>           | <b>Forward (5' &gt; 3')</b> | <b>Reverse (5' &gt; 3')</b> |
|-----------------------|-----------------------------|-----------------------------|
| <b>Actb</b>           | GGCTGTATTCCCCTCCATCG        | CCAGTTGGTAACAATGCCATGT      |
| <b>Adgre1 (F4/80)</b> | TTTCCTCGCCTGCTTCTTC         | CCCCGTCTCTGTATTCAACC        |
| <b>Adipoq</b>         | GGCAGGAAAGGAGAACCTGG        | CAGGCTGTCTTTTGTCAACGA       |
| <b>Arg1</b>           | AGACCACAGTCTGGCAGTTG        | CCACCCAAATGACACATAGG        |
| <b>Ccl2</b>           | GGCTCAGCCAGATGCAGT          | GCTGCTGGTGATCCTCTTGT        |
| <b>Ccr2</b>           | TGCCATCATAAAGGAGCCA         | AGCACATGTGGTGAATCCAA        |
| <b>Itgax (CD11c)</b>  | CAGAACTTCCCAACTGCACA        | TCTCTGAAGCTGGCTCATCA        |
| <b>Gapdh</b>          | AACTTTGGCATTGTGGAAGG        | ACACATTGGGGGTAGGAACA        |
| <b>Ifng</b>           | CAGCTCTTCCTCATGGCTGT        | ATCTGGCTCTGCAGGATTTT        |
| <b>Il10</b>           | AGTGGAGCAGGTGAAGAGTG        | CACTGCAGGTGTTTTAGCTTT       |
| <b>Il18</b>           | GACTCTTGCGTCAACTTCAAGG      | CAGGCTGTCTTTTGTCAACGA       |
| <b>Il6</b>            | TCCAGTTGCCTTGGGAC           | GTGTAATTAAGCCTCCGACTTG      |
| <b>Ilb</b>            | AGTTGACGGACCCCAAAAG         | GCGAGATTTGAAGCTGGATG        |
| <b>Mcp1</b>           | AGGTCCCTGTCATGCTTCTG        | TCATTGGGATCATCTTGCTG        |
| <b>Mrc1 (CD206)</b>   | TGATTACGAGCAGTGGAAAGC       | GTTACACGTAAGCCCAATTT        |
| <b>Nrf1</b>           | CAACAGGGAAGAAACGGAAA        | GCACCACATTCTCCAAAGGT        |
| <b>Nfe2l2</b>         | AGGTTGCCACATTCCCAAACAAG     | TTGCTCCATGTCCTGCTCTATGCT    |
| <b>Ppara</b>          | AGAGCCCCATCTGTCTCTC         | ACTGGTAGTCTGCAAAACCAAA      |
| <b>Ppargc1a</b>       | GCAGGCCTAACTCCTCCCACGA      | TGGTGGAGTGGCTGCCTTGG        |
| <b>Sfrp5</b>          | CACTGCCACAAGTTCCTCC         | TCTGTTCCATGAGGCCATCAG       |
| <b>Tfam</b>           | GTCCATAGGCACCGTATTGC        | CCCATGCTGGAAAAACACTT        |
| <b>Tgfb1</b>          | CTCCCGTGGCTTCTAGTGC         | GCCTTAGTTTGGACAGGATCTG      |
| <b>Tgfb2</b>          | TTGTTGCCCTCCTACAGACTGG      | GTAAAGAGGGCGAAGGCAGCAA      |
| <b>Tgfb3</b>          | CCTGGCCCTGCTGAACTTG         | TTGATGTGGCCGAAGTCCAAC       |
| <b>Tnfa</b>           | CCACCAGCTCTTCTGTCT          | GCTCCTCCACTTGGTGGTTT        |
| <b>Ucp1</b>           | AGGCTTCCAGTACCATTAGGT       | CTGAGTGAGGCAAAGCTGATTT      |
| <b>Ucp3</b>           | CCTACGACATCATCAAGGAGAA      | GCCACCATCTTCAGCATACA        |
